# Supplementary material for: Amorphous silica nanoparticles cause abnormal cytokinesis and multinucleation through dysfunction of the centralspindlin complex and microfilaments
Source: Research Square preprint supplement (doi:10.21203/rs.3.rs-1952074/v1), 2022-08-19

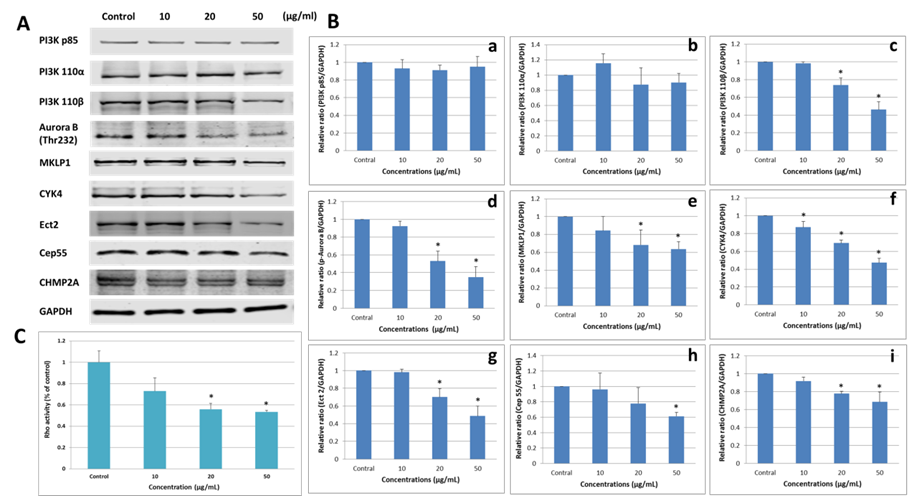


PI3K P85


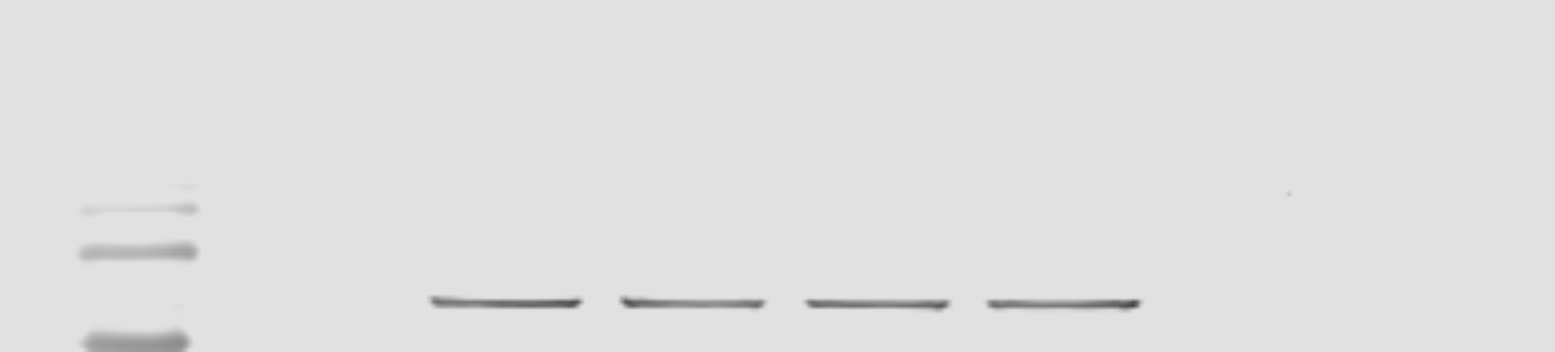


PI3K 110α


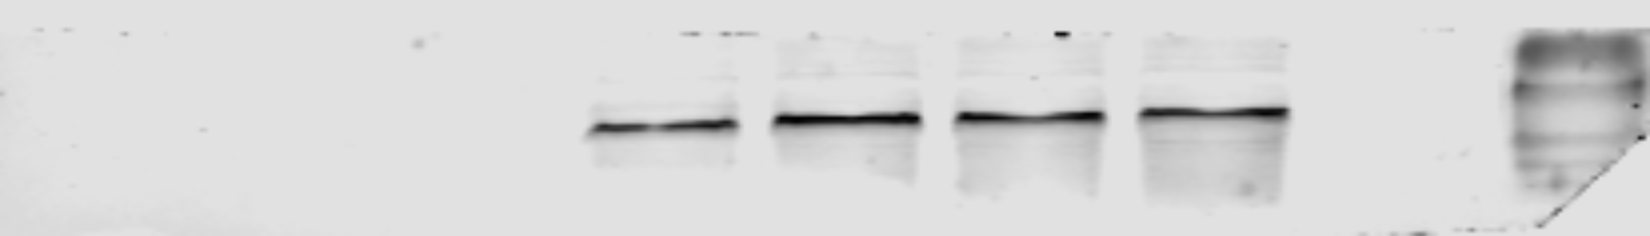


PI3K 110β


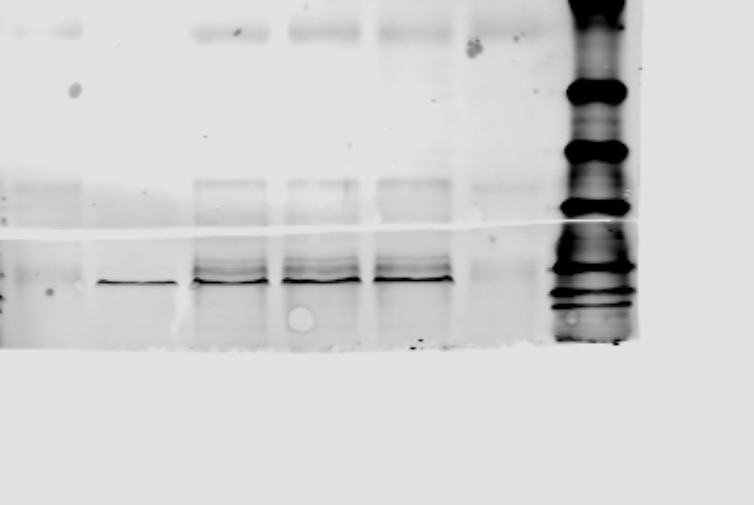


Aurora B (Thr232)


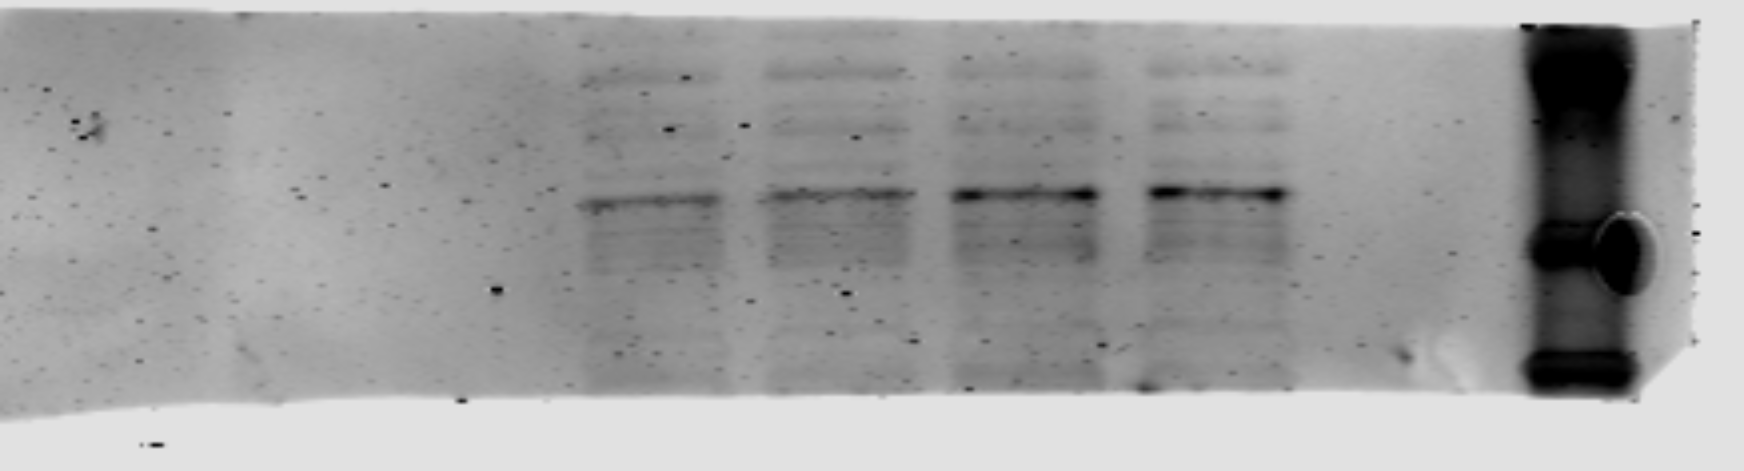


MKLP1


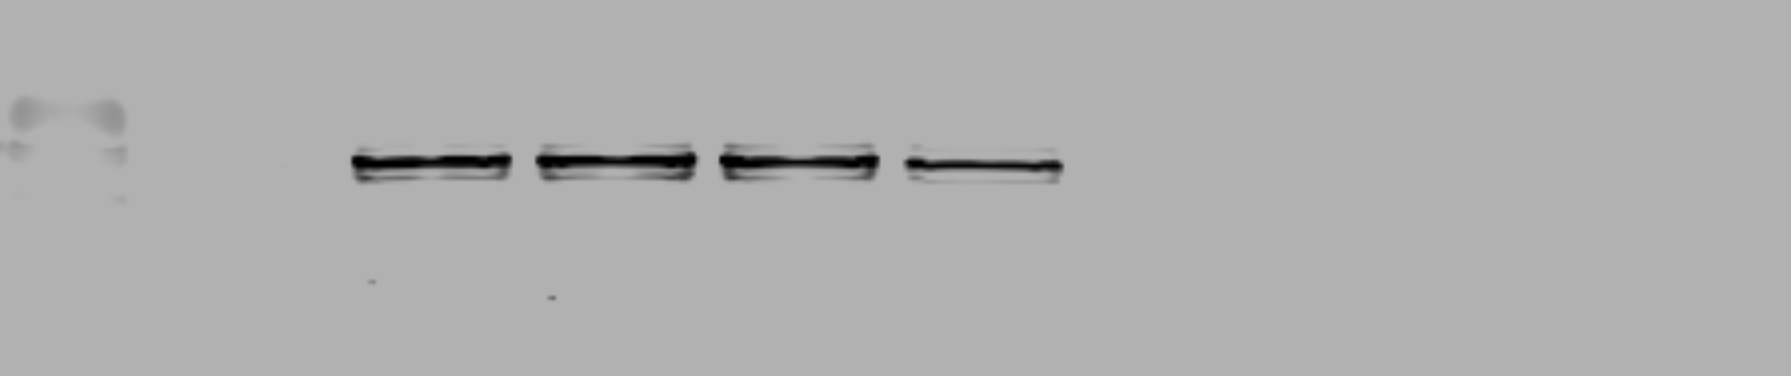


CYK4


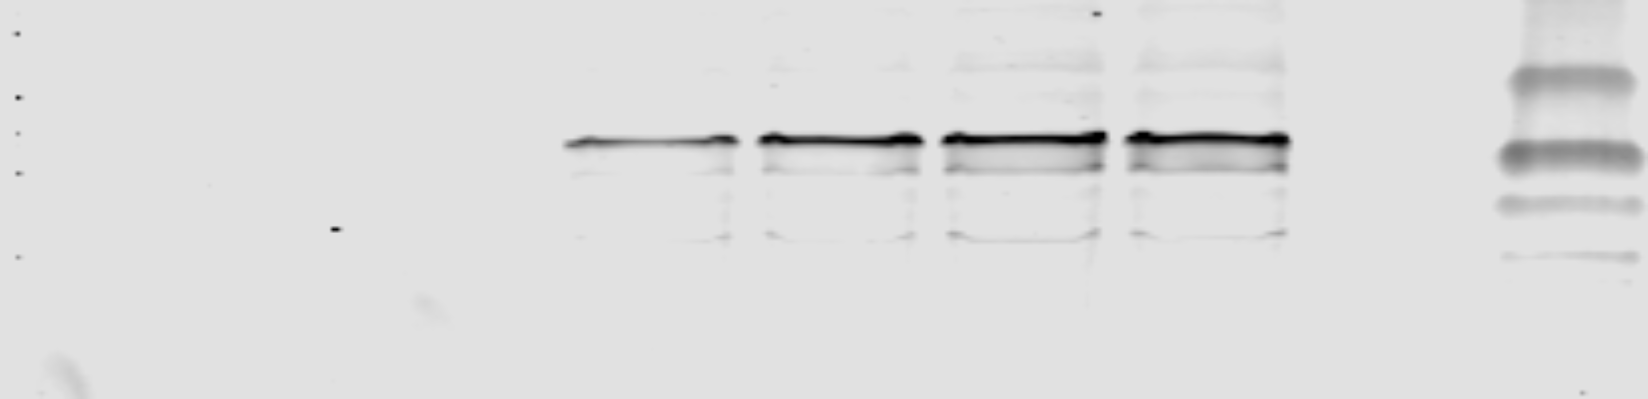


ECT2


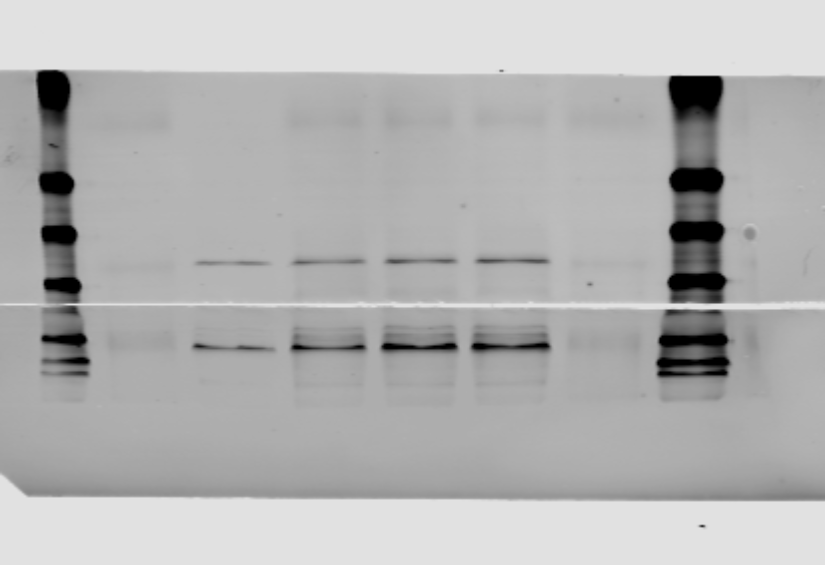


CEP55


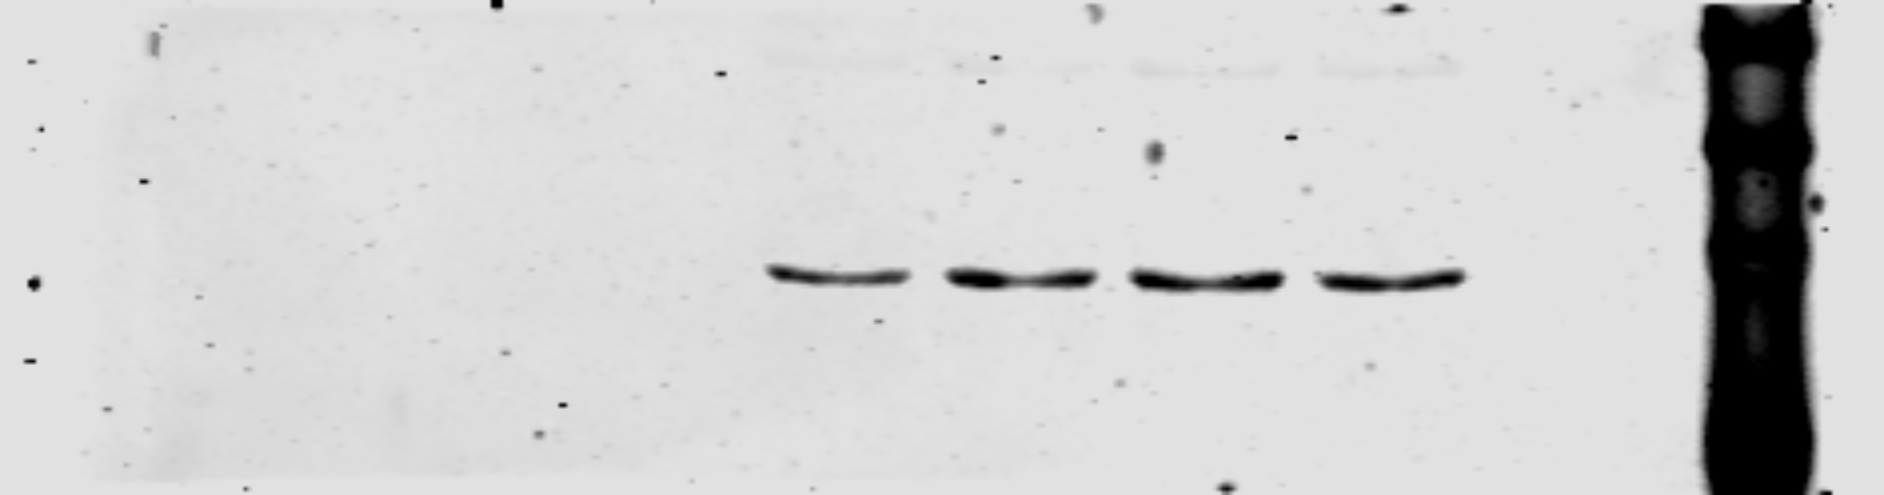


CHMP2A


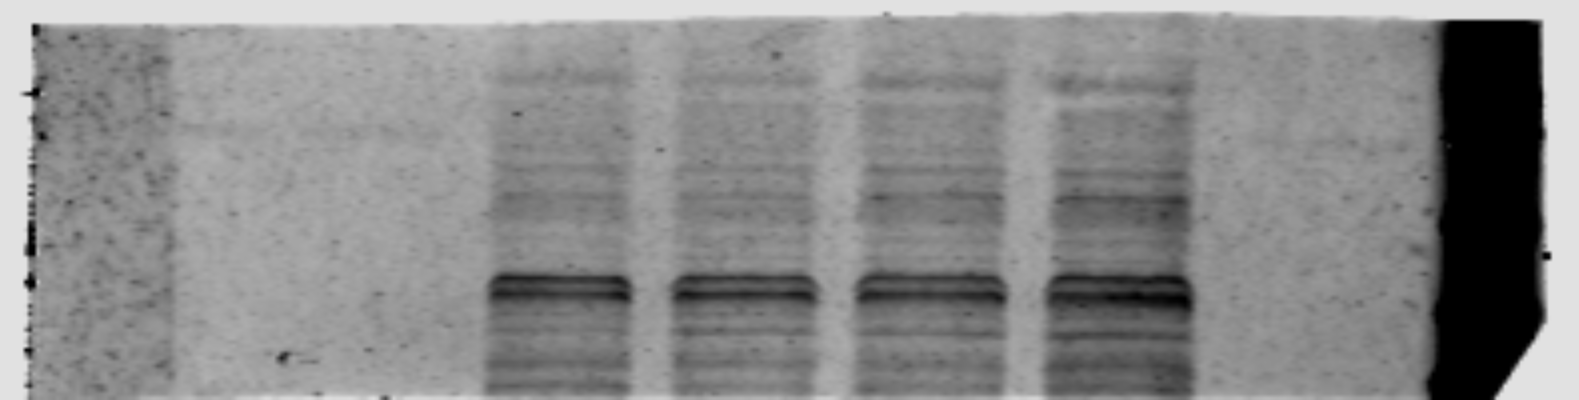


GAPDH


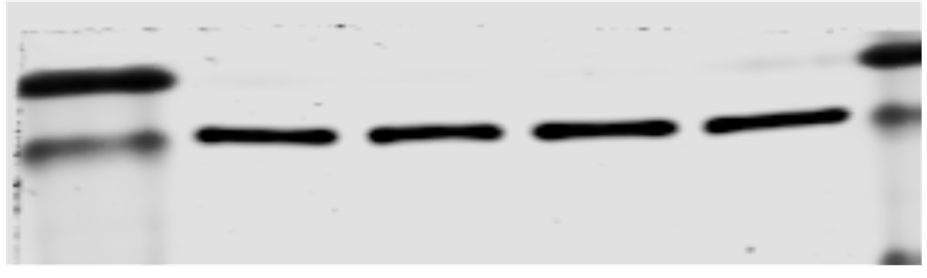


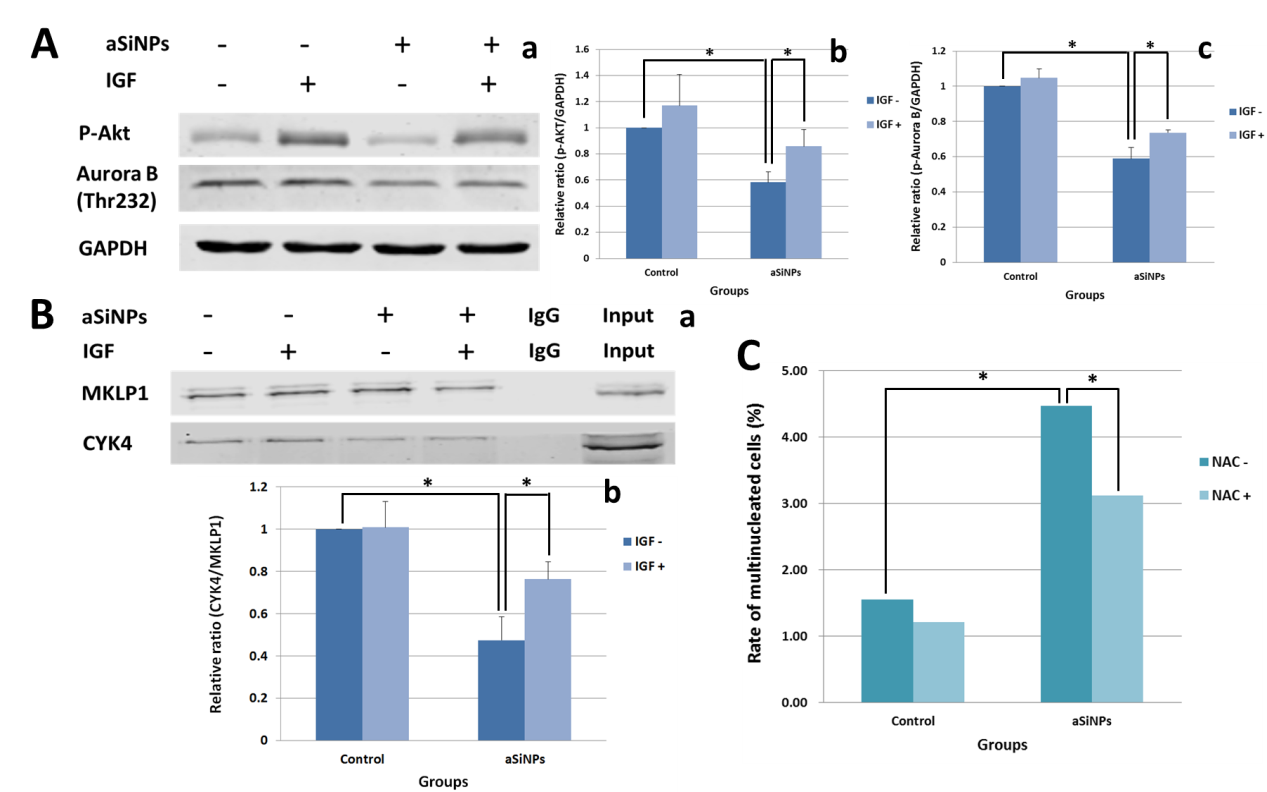


P-Akt


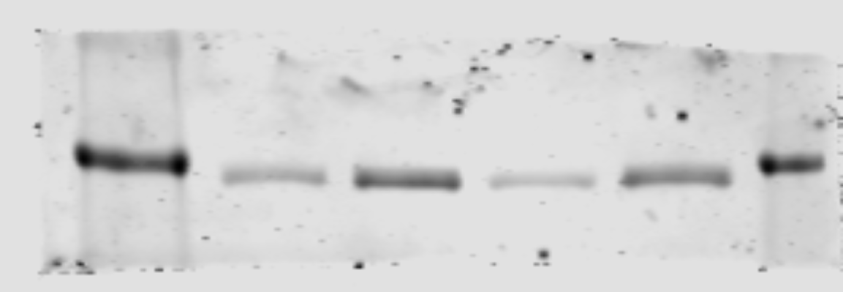


Aurora B (Thr232)


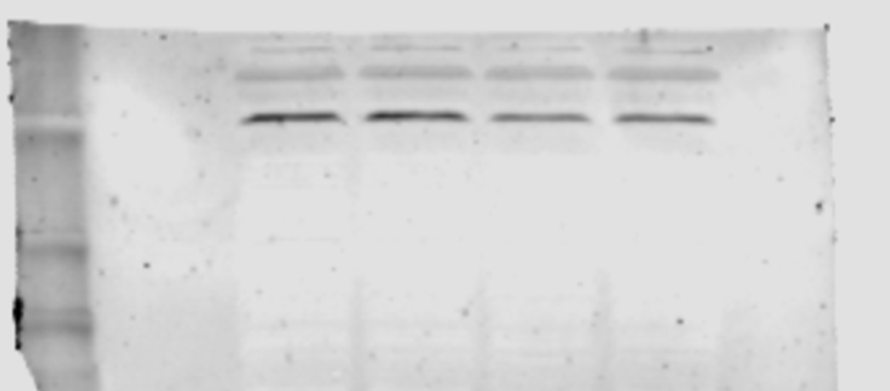


GAPDH


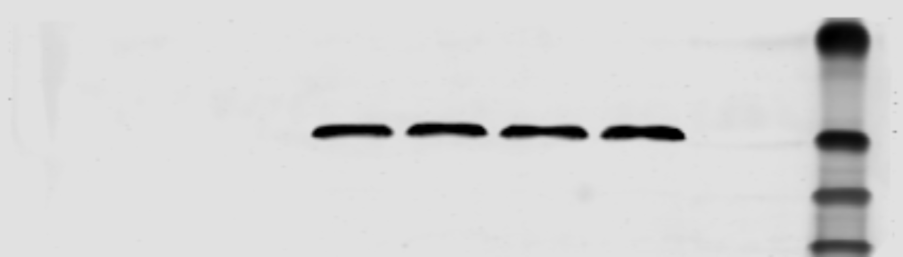


CO-IP MKLP1


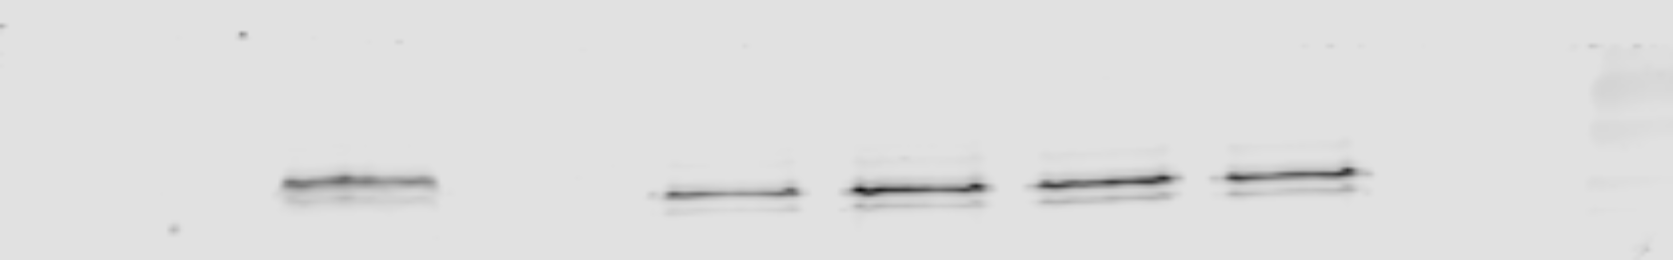


CO-IP CYK4


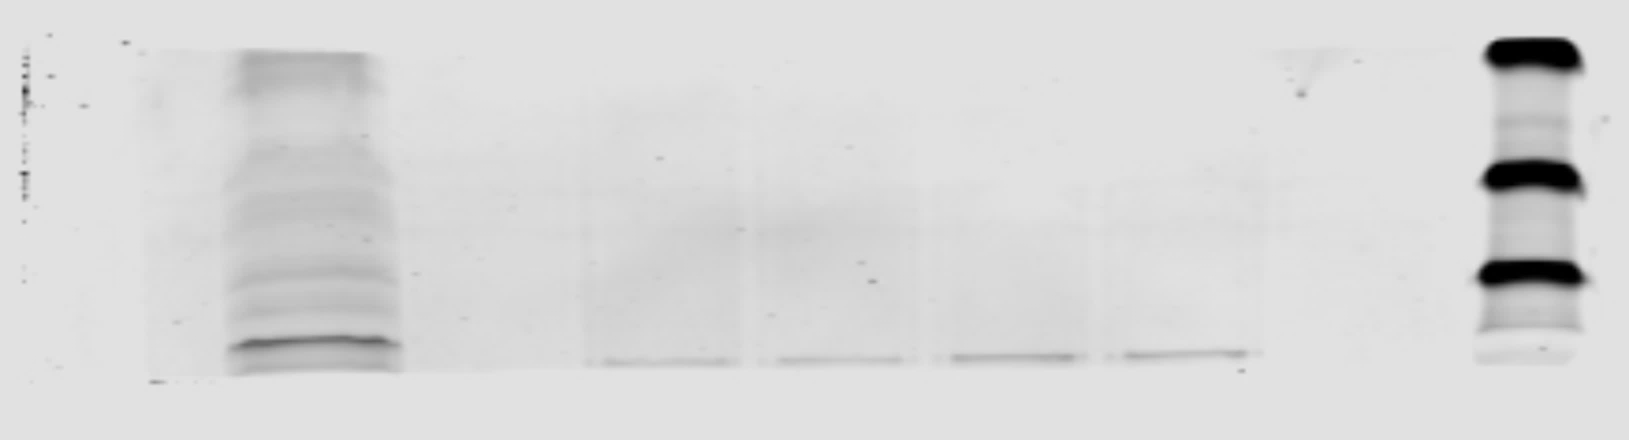


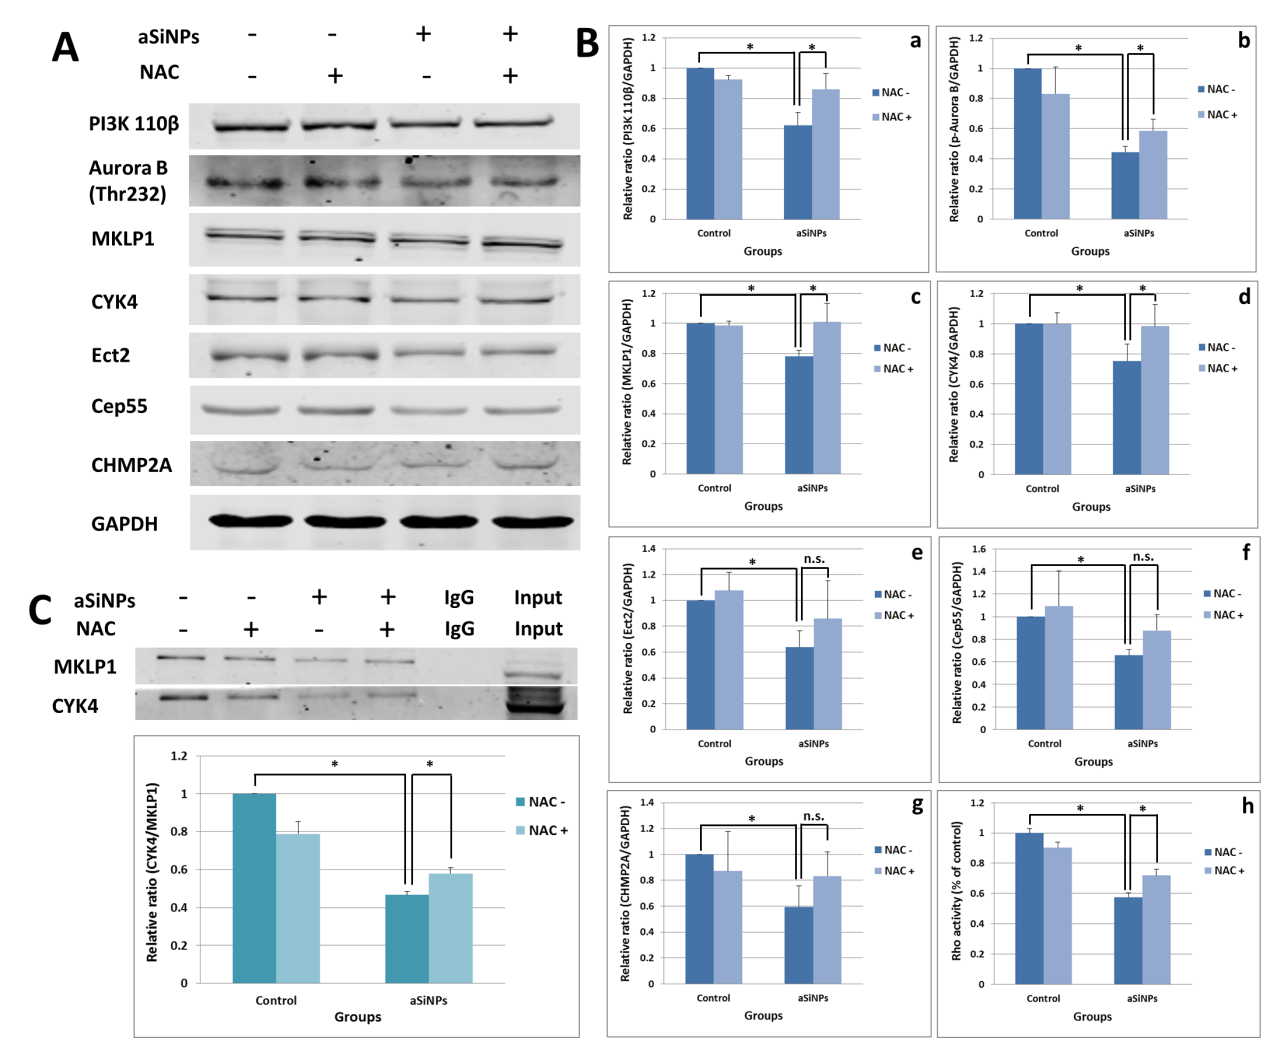


PI3K 110B L-02 Si +NAC


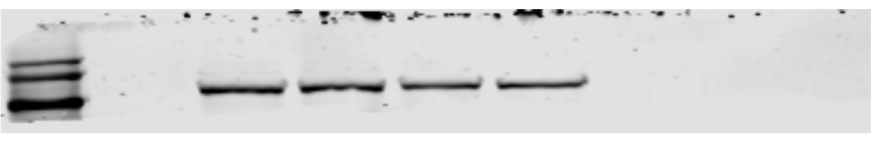


Aurora B T232 L-02 Si +NAC


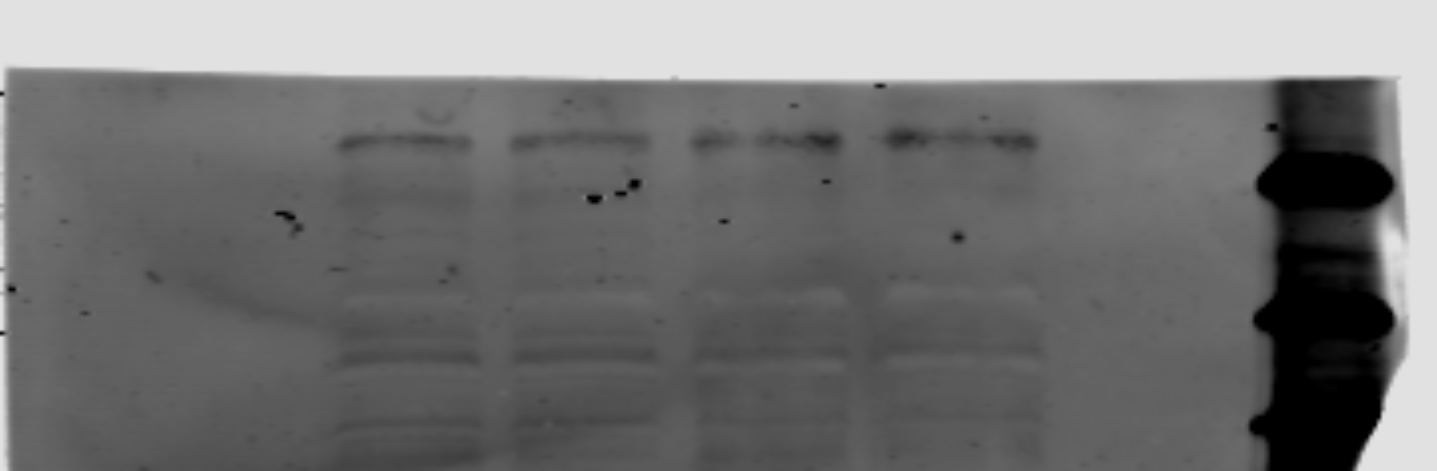


MKLP1


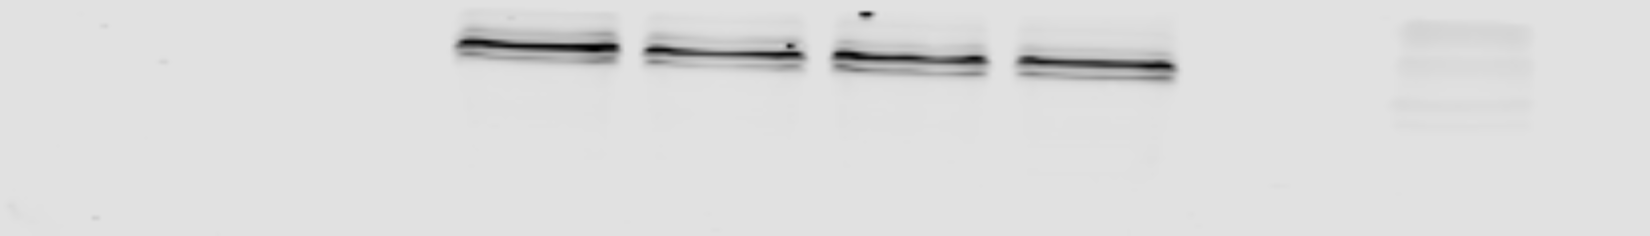


CYK4


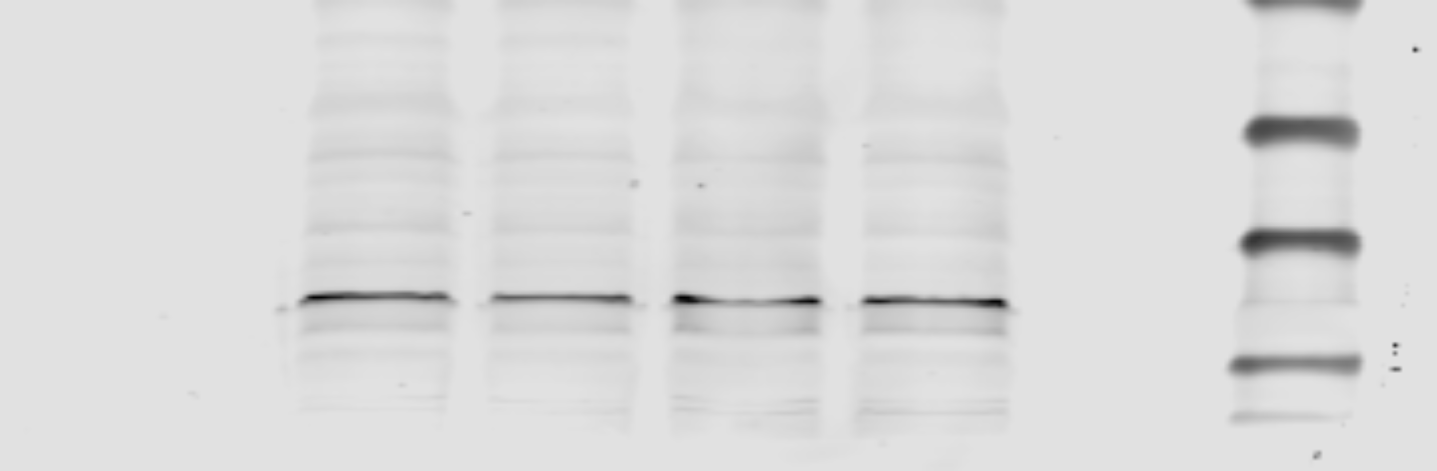


ECT2


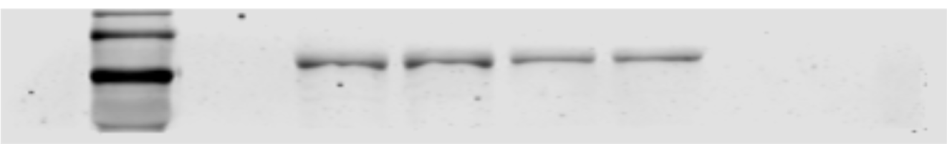


CEP55


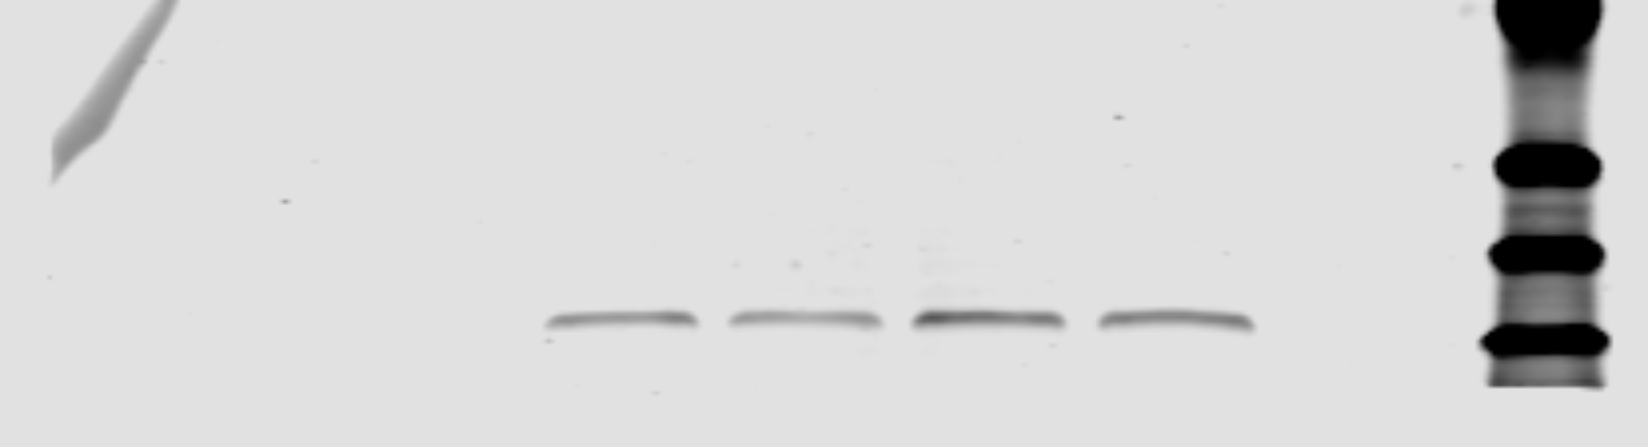


CHMP2A


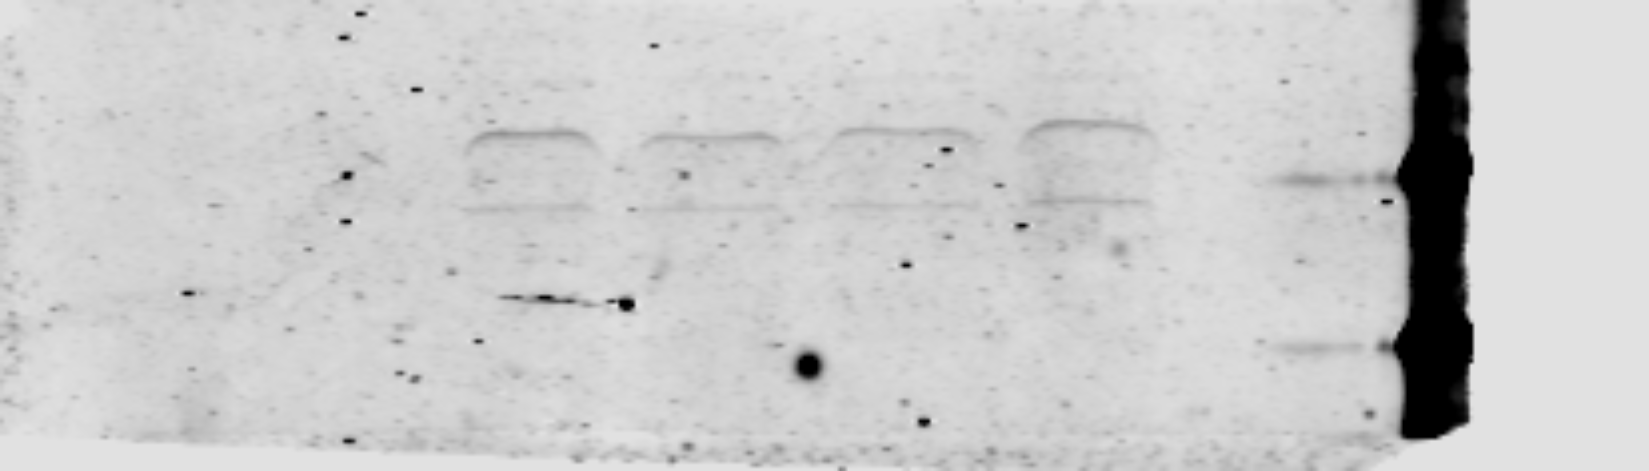


GAPDH


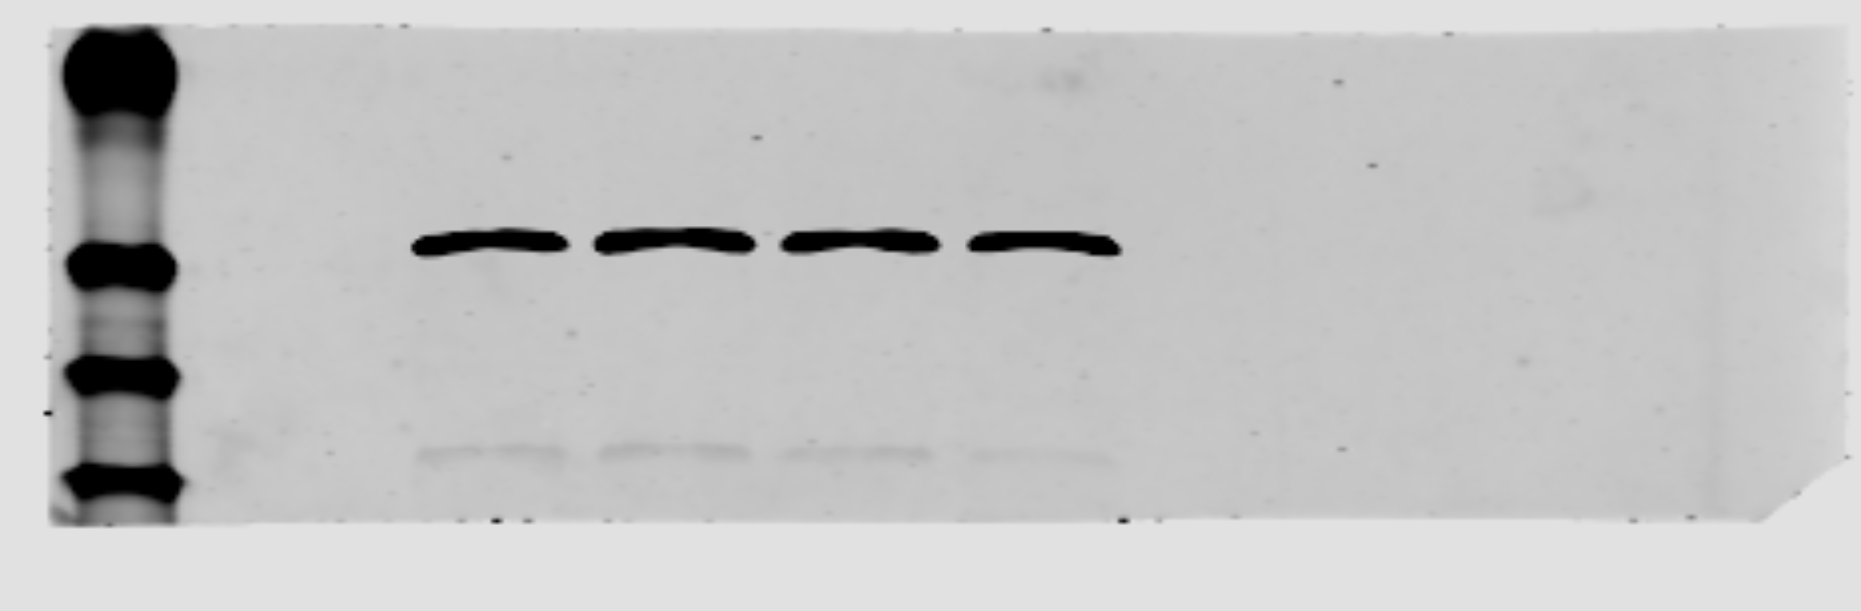


CO-IP MKLP1


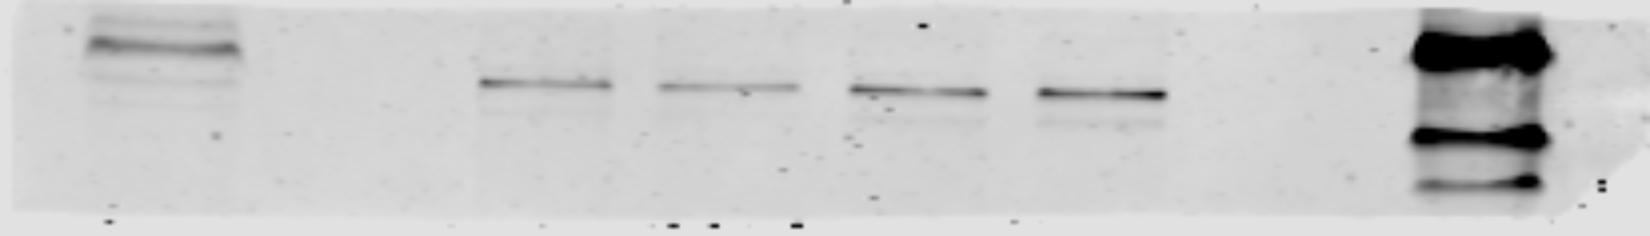


CO-IP CKY4


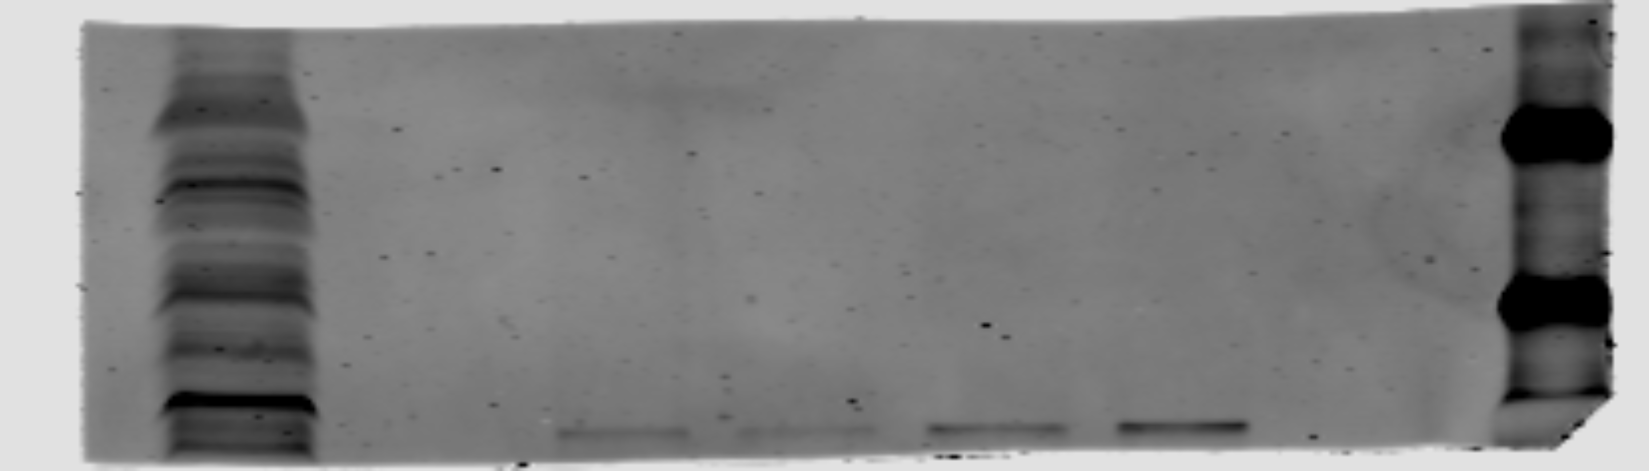

Supplement: Supplementary file 1 [file afca44fd2e17963fc959f082.docx]
